RESEARCH ARTICLE

# The timing of the *Castelnovisation* of southwestern Europe: A Bayesian modelling insight from the Romagnano Loc III rock shelter sequence (Trento, Italy)

Salvador Pardo-Gordó<sup>1\*</sup>, Alex Fontana<sup>2</sup>, Vanessa Extrem-Membrado<sup>3\*</sup>, Emilio Vacas-Fumero<sup>4</sup>, Rossella Duches<sup>5</sup>, Elisabetta Flor<sup>6</sup>, Federica Fontana<sup>6</sup>

**1** GISPRAYA Research Group, Departamento de Geografía e Historia, Universidad de La Laguna, San Cristóbal de La Laguna, Tenerife, Spain, **2** Research and Museum Collections Office, MUSE – Museo delle Scienze di Trento, Trento, Italy, **3** PREMEDOC Research Group, Departament of Prehistory, Archaeology and Ancient History, University of Valencia, Valencia, Comunitat Valenciana, Spain, **4** Departamento de Geografía e Historia, Universidad de La Laguna, San Cristóbal de La Laguna, Tenerife, Spain, **5** Sezione di Preistoria, MUSE – Museo delle Scienze di Trento, Trento, Italy, **6** Sezione di Scienze Preistoriche e Antropologiche, Dip. Di Studi Umanistici, Università di Ferrara, Ferrara, Italy

\* [spardogo@ull.edu.es](mailto:spardogo@ull.edu.es) (SPG); [vanessa.extrem@uv.es](mailto:vanessa.extrem@uv.es) (VEM)

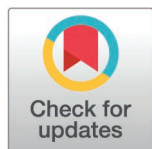

## OPEN ACCESS

**Citation:** Pardo-Gordó S, Fontana A, Extrem-Membrado V, Vacas-Fumero E, Duches R, Flor E, et al. (2025) The timing of the *Castelnovisation* of southwestern Europe: A Bayesian modelling insight from the Romagnano Loc III rock shelter sequence (Trento, Italy). PLoS One 20(9): e0331392. <https://doi.org/10.1371/journal.pone.0331392>

**Editor:** Carlos P. Odriozola, Universidad de Sevilla, SPAIN

**Received:** April 11, 2025

**Accepted:** August 14, 2025

**Published:** September 16, 2025

**Copyright:** © 2025 Pardo-Gordó et al. This is an open access article distributed under the terms of the [Creative Commons Attribution License](https://creativecommons.org/licenses/by/4.0/), which permits unrestricted use, distribution, and reproduction in any medium, provided the original author and source are credited.

**Data availability statement:** All relevant data are within the paper and its [Supporting Information](#) files.

**Funding:** This work was funded by the project PID2021-127141NA-I00 funded by MICIU/

## Abstract

This paper provides a review of the Mesolithic sequence at the Romagnano loc III site through Bayesian modelling, combining the radiocarbon dates obtained in the 1970s with more recent <sup>14</sup>C dates. The results suggest a chronology associated with the Castelnovian complex that predates those identified in other areas of Southwestern Europe, thus offering a new working hypothesis regarding the origin of this complex. Finally, these findings are discussed within the broader context of the origin and expansion of the Blade Trapeze Complex in Southwestern Europe indicating that the emergence of this new complex was a multifaceted process that can only be fully understood through a comprehensive global approach.

## Introduction

During the VII millennium cal. BCE, essential changes in lithic technology are recorded in the Western European Mesolithic, defined as a *revolution* [1]. Despite regional variations in the tools style and ornaments [2], this techno-typological regularisation extends throughout the western Mediterranean. These changes involve introducing pressure and indirect percussion techniques to produce regular blades and bladelets that were set up into arrowheads of geometric shapes and a wide array of trapezoidal armatures. This standardization, corresponding to the Second or Late Mesolithic [3] represents a shift to the Early Mesolithic. In addition to the debate on the possible continuity of certain elements associated with lithic production [4–6], the chronology associated with the Second Mesolithic in Southern Europe, also known

AEI/10.13039/501100011033 and ERDF/EU a way to make Europe, and the project MESUZZO funded the University of La Laguna, the Spanish Ministry of Universities and the Regional Campus of Excellence (Canarias Atlántico tricontinental). SPG is supported by Ramón y Cajal program (RYC2021-033700-I) funded by MCIN/AEI/<https://doi.org/10.13013/501100011033> and FEDER a way to make Europe. VEM is beneficiary by predoctoral grant Atracció de Talent del Vicerectorat d'Investigació de la Universitat de València (UV-INV-PREDOC22-2228793). EVF is the beneficiary of a PhD grant from the ACIISI and FSE (TESIS2021-010075).

**Competing interests:** The authors have declared that no competing interests exist.

as *Castelnovianisation* [7], is controversial and sometimes inconsistent due to the quality of the available radiocarbon information.

This paper focuses on the stratigraphic sequence of the Romagnano Loc III rock shelter (Trentino, North-Eastern Italy), a well-known site and one of the most important deposits of reference for the Mesolithic in Italy. In 1969, Renato Perini excavated to establish the archaeological sequence of the site, carrying out four trenches (I, II, III, IV), which allowed him to document a sequence between modern times and the Mesolithic [8]. Accordingly, Alberto Broglio in the 1970s interpreted the long Mesolithic sequence by dividing it into two main cultural complexes the Tardenoisian and Sauveterrian following the recently defined French chronology [9]. At present, the chronological sequence of Holocene hunter-gatherers in Northern Italy includes several horizons [10,11]. The Early Mesolithic (Sauveterrian) is characterised by the production of irregular lamellar blanks, flakes and microlithic armatures (*Sauveterre* points, triangles and crescents). This is followed by the Late Mesolithic (Castelnovian), defined by regular blades and bladelets productions which were transformed into different types of trapezes and a variety of tools made on lamellar blanks. In this paper, we focus our objective on the application of chronological analysis of the Mesolithic layers identified in the 1970s to evaluate the Early to Late Mesolithic Transition based on new radiometric program realised. Finally, we will place these results in the context of the Castelnovianisation of Southwestern Europe.

## Materials and methods

### Romagnano Loc III rock shelter

Romagnano rock shelter lies in the Adige Valley, a natural corridor between the Alps and the Po Plain (Fig 1) and contains one of the most impressive stratigraphic sequences in the Italian peninsula spanning the Mesolithic to the Iron Age. It is about 6 meters thick where the upper units correspond to Bronze Age (layer P), Chalcolithic (layer Q1), Recent Neolithic (layer R-Q2), Middle Neolithic (layer T2-S) and Early Neolithic (layer T4-T3) while the bottom ones are dated (AF-AA and U-Z) to the Mesolithic. Anthracological studies show a typical Holocene vegetation, wherein the bottom layers the *Pinus* sp. t. *sylvestris* is documented as the most abundant taxon as opposed to the dominant *Quercus* deciduous from the ceramic layers [13]. Between 1971 and 1973, A. Broglio excavated the Mesolithic layers over an approximate area of 4 meters and reaching a variable depth (from 2 to 2.5 meters). According to Broglio and Kozłowski [12] the Mesolithic layers can be broadly summarised as: 1.) **Ancient Sauveterrian**, layers AF and AE: composed by clasts and dated between  $9830 \pm 90$  BP (R-1147) and  $9420 \pm 60$  BP (R-1146a) which are covered by sterile alluvial gravel deposition (layer AD). From a typological view this phase is characterised by the predominance of triangles over the double back points. 2.) **Middle Sauveterrian**, layers AC9 to AC3: except from AC9 which corresponds to a transitional phase between AD and AC8, these are characterised by the predominance of fine limestone and a few detrital materials [14]. This phase is dated between  $9200 \pm 60$  BP (R-1145) and  $8590 \pm 70$  BP (R-1141), and the lithic industry

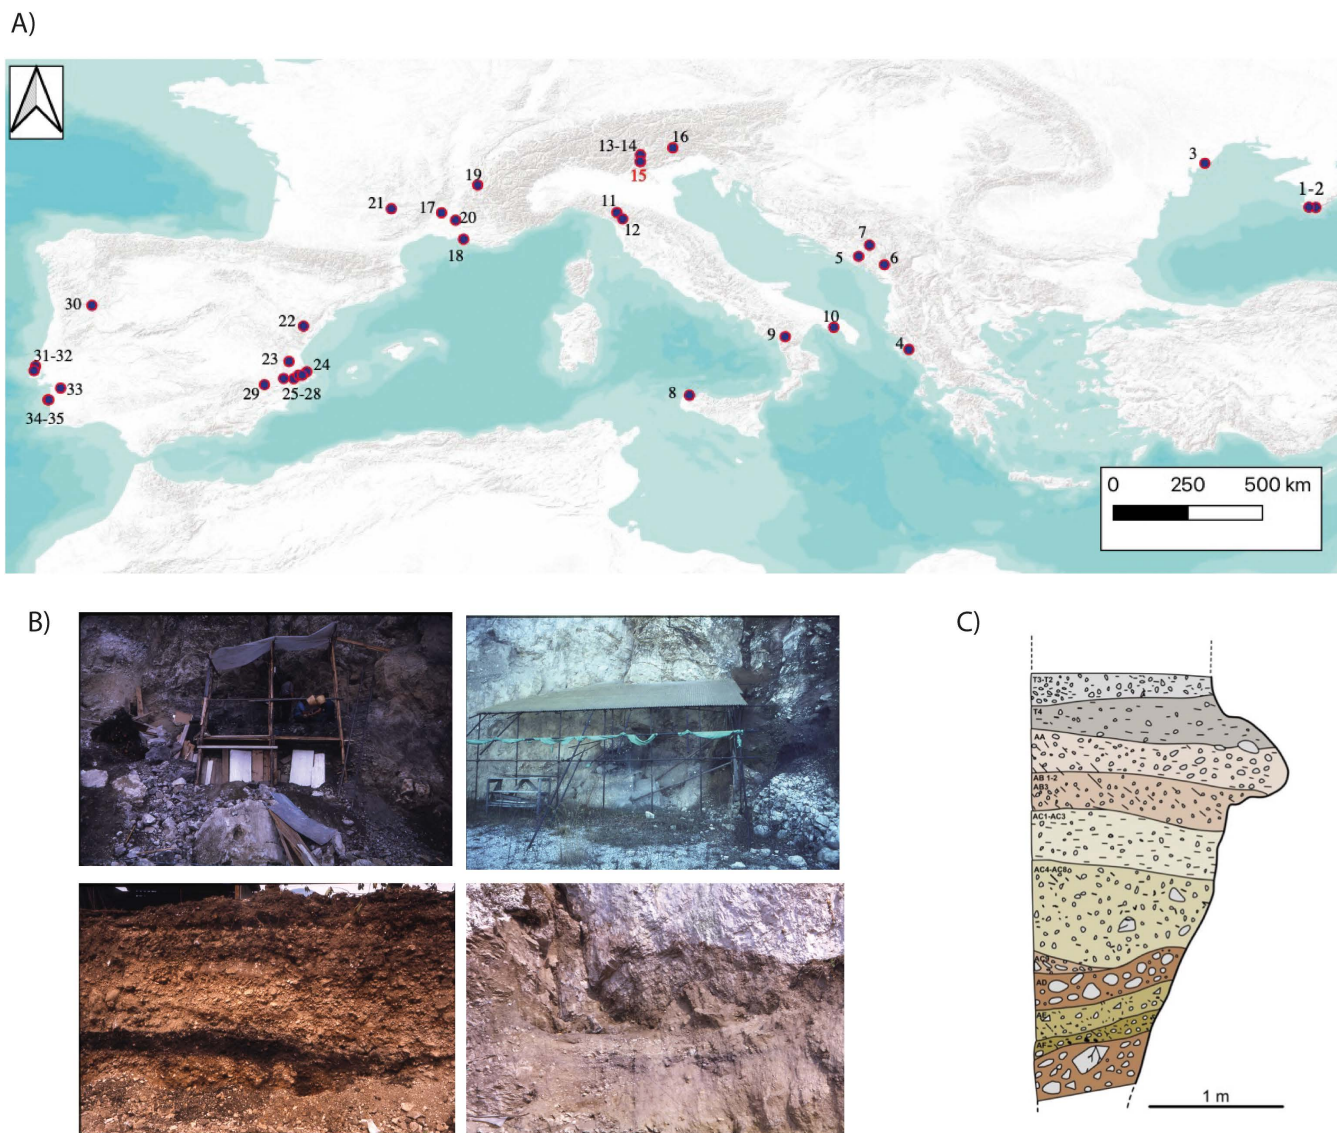

**Fig 1. A) Sites used in this work.** Crimea region: 1. Shan-Koba, 2. Lapsi 7, 3. Myrne. Western Balkans: 4. Konispol, 5. Cverna Stijena, 6. Vruća Pećina, 7. Odmut. South Italy: 8. Grotta dell'Uzzo, 9. Latronico-3, 10. Terragne di Manduria. North Italy: 11. Lama Lite, 12. Piazzana, 13. Riparo Gaban, 14. Mezzocorona-Borgonuovo, 15. Romagnano III, 16. Mondeval de Sora. France: 17. Baume Montclus, 18. Font-des-Piegons, 19. Grande-Rivoire, 20. Mourre du Sève, 21. Roquemissou. Eastern Spain: 22. Barranc de la Fontanella, 23. Cueva de la Cocina, 24. El Collao, 25. Benàmer, 26. Tossal de la Roca, 27. Abric de la Falguera, 28. Casa Corona, 29. Cueva Blanca. Portugal: 30. Prazo, 31. Costa do Pereiro, 32. Cova da Baleia, 33. Samouqueira I, 34. Vale de Romerías, 35. Vale Marim. Maps modified from ESRI World Terrain Base Map. B) General view of Romagnano excavation during 1971 and profile details under CC BY license, with permission from MUSE, original copyright 1971. C) Mesolithic stratigraphy republished from [12] (redrawing by Daniel S. Hernández Hernández) under CC BY license, with permission from MUSE, original copyright 1983.

<https://doi.org/10.1371/journal.pone.0331392.g001>

shows a reduction in the number of segments and an increase of triangles. 3.) **Recent Sauveterrian**, layers AC2 and AC1: sedimentarily, it does not differ from the previous layers. Likewise, the lithic industry presents the same characteristics as in the Middle Sauveterrian, except for the reduction of the backed points; chronologically, this phase is located between  $8560 \pm 70$  BP (R-1140) and  $8220 \pm 70$  BP (R-1139). 4.) **Early Castelnovian**, layers AB3 to AB1: correspond to artificial layers characterised by the same sedimentation as the previous layers and dated by radiocarbon dating between

8140±80 BP (R-1138) and 7500±160 BP (R-1137a). It is at this time that the emergence of the trapezoids characteristic of the Recent Mesolithic can be observed, although some elements of the Sauveterrian tradition have been documented. Particularly AB3 is considered by the authors as a transition or a reworked layer [12]. Finally, the layers AA2-AA1 correspond to the **Late Castelnovian**. This phase has a chronology of 6480±50 BP (R-1136), and although it presents some evidence of ceramics associated with taphonomy problems, the cultural information is defined by the notable increase in lamellar elements made by pressure-knapping and asymmetric Montclus type trapezes associated to symmetric ones with double concave truncations [5,6].

### The radiocarbon dates

The first chronological framework for Romagnano III was published in 1978 by the members of the Rome Radiocarbon laboratory [15]. A total of 25 conventional radiocarbon dates were obtained from singular non-identified charcoal fragments (Table 1). The radiocarbon sequence is consistent at an intra-site level. However, if we focus on the Mesolithic dates, at least the sample R-1138 (8140±80 BP), recovered from the layer AB3, presents problems with the radiocarbon corpus of southwestern Europe [18]. In this sense, the first issue to be considered is the nature of the sample and the possible evidence of the *old wood effect* [19,20]. Likewise, this layer has been interpreted as a consequence of reworked [12], therefore the existence of post-depositional problems could be considered.

Recently, we carried out a new radiocarbon program focused on Mesolithic layers. However, the layer that could not be dated due to the absence of collagen comes from the base of the sequence (AF/AE layer). A total of 17 new AMS dates have been obtained allowing to date the bottom of the sequence to *ca.* 9500 cal. BCE and the top of Late Castelnovian layers to *ca.* 5000 cal. BCE (Table 1). Samples were taken from animal bones (*Cervus elaphus*, *Rupricapra rupricapra*, *Sus scrofa* and *Capra ibex*) and sent to the French laboratory CIRAM; samples were treated following their standard protocols available on the laboratory website. Lastly, all dates have the information associated with stable isotopes <sup>13</sup>C and <sup>15</sup>N (IRMS with an error below 0,1‰) and the carbon-nitrogen ratio (CN), which is within the reference values [21,22].

### Bayesian chronological modelling

To build a high-resolution chronological framework of the Mesolithic occupations at Romagnano III and obtain the most accurate modelling possible, only short-lived dating was used, except for those layers that do not have it (AE and AF). Additionally, the available date for the Early Neolithic level of Romagnano (T4) was used as a *terminus ante quem*. We have designed several models using OxCal v. 4.4 [16], and all dates have been calibrated using the IntCal20 [17] applying a continuous sequential model and using a T general model to detect outlier dates; the dates in the model are assumed to present a Student's t distribution with 5 degrees of freedom [23]. This proposal undertakes a continuous transition between each of the phases considered without the existence of chronological gaps. These models were conceptualised to analyse the chronology of the Sauveterrian and Castelnovian without considering their internal periodisation. This first model assumes AB3 layer as a unit associated with the Castelnovian and layer AC9 is related to the Sauveterrian. In the second model, we do not consider layers AB3 and AC9 due to their palimpsestic character, as indicated in the stratigraphic description. After exploring the Sauveterrian-Castelnovian chronology of Romagnano, we tested a sequential model that includes the internal cultural division of each internal phase of the Mesolithic sequence. This approach allows us to evaluate possible outliers statistically and to decide whether to keep or eliminate them in the construction of the chronological sequence [24]. OxCal has several diagnostic tools to assess the MCMC chain's efficiency (convergence value) and the concordance of data ( $A_{\text{model}}$  and  $A_{\text{overall}}$  indices). For modelling to be statistically acceptable, the convergence value (C) must be higher than 95%, while the concordance values have a minimum threshold of 60%.

**Table 1. Radiocarbon dates published previously, and the new dataset was obtained in the context of this work. All dates were calibrated in OxCal [16] using the IntCal20 curve [17].**

| Lab         | Level      | Unit                     | Sample                 | Specie                       | BP   | SD  | 13C    | 15N  | CN  | Cal. 68% BCE | Cal. 95% BCE | Ref.      |
|-------------|------------|--------------------------|------------------------|------------------------------|------|-----|--------|------|-----|--------------|--------------|-----------|
| R-767       | Layer 12   | Hearth                   | Charcoal               | n.d                          | 2600 | 140 | -25    | n.d  | —   | 906–540      | 1106–393     | [15]      |
| R-768       | Land slide |                          | Charcoal               | n.d                          | 3000 | 50  | -25    | n.d  | —   | 1375–1128    | 1400–1056    | [15]      |
| R-769       | P1         | Burial 1                 | Charcoal               | n.d                          | 3720 | 50  | -24.9  | n.d  | —   | 2198–2035    | 2258–1961    | [15]      |
| R-770a      | P2-3       | Burial 4 & 5             | Charcoal               | n.d                          | 3630 | 50  | -24.4  | n.d  | —   | 2122–1926    | 2189–1831    | [15]      |
| R-775       | R4         | Hearth                   | Charcoal               | n.d                          | 4810 | 50  | -25.2  | n.d  | —   | 3643–3529    | 3702–3382    | [15]      |
| R-777a      | T1         | Hearth (under R-776)     | Charcoal               | n.d                          | 5530 | 50  | -25.5  | n.d  | —   | 4444–4339    | 4489–4261    | [15]      |
| R-776       | T1         | Hearth                   | Charcoal               | n.d                          | 5560 | 50  | -25.1  | n.d  | —   | 4446–4339    | 4499–4331    | [15]      |
| R-779a      | T2         | Hearth (layer 1)         | Charcoal               | n.d                          | 5470 | 50  | -26    | n.d  | —   | 4358–4255    | 4445–4175    | [15]      |
| R-781       | T4         | Under Hearth             | Charcoal               | n.d                          | 5810 | 50  | -25.7  | n.d  | —   | 4726–4555    | 4790–4542    | [15]      |
| R-781a      | T4         | Under Hearth             | Charcoal               | n.d                          | 6060 | 50  | -26    | n.d  | —   | 5033–4853    | 5206–4799    | [15]      |
| CIRAM-7962  | AA1        | q. 3β/MUSE-PRE-c120 6131 | Bone (Phalanx 2)       | <i>Cervus elaphus</i>        | 6138 | 34  | -21.83 | 3.36 | 3.2 | 5207–5002    | 5211–4960    | This work |
| R-1136      | AA1–2      |                          | Charcoal               | n.d                          | 6480 | 50  | -26.9  | n.d  | —   | 5479–5377    | 5531–5324    | [15]      |
| CIRAM-8164  | AA2        | q. 5α/MUSE-PRE-c120 6142 | Bone (Calcaneus)       | <i>Cervus elaphus</i>        | 6729 | 36  | -22.47 | 3.52 | 3.3 | 5669–5571    | 5717–5566    | This work |
| CIRAM-10298 | AB1        | q. 4β/MUSE-PRE-c120 6144 | Bone (Metatarsus)      | <i>Cervus elaphus</i>        | 7106 | 36  | -22.3  | 3.98 | 3.2 | 6021–5921    | 6063–5900    | This work |
| CIRAM-7964  | AB1        | q. 3β/MUSE-PRE-c120 6129 | Bone (Phalanx 1)       | <i>Cervus elaphus</i>        | 7801 | 36  | -21.26 | 2.84 | 3.2 | 6683–6593    | 6695–6505    | This work |
| R-1137      | AB1–2      |                          | Charcoal               | n.d                          | 7850 | 60  | -27.3  | n.d  | —   | 6815–6597    | 7032–6511    | [15]      |
| CIRAM-7965  | AB2        | q. 4β/MUSE-PRE-c120 6128 | Bone (Phalanx 1)       | <i>Rupricapra rupricapra</i> | 7208 | 36  | -20.49 | 3.9  | 3.2 | 6080–6020    | 6217–5991    | This work |
| CIRAM-10300 | AB2        | q. 4β/MUSE-PRE-c120 6157 | Tooth (Molar 1 inf.)   | <i>Capra ibex</i>            | 7709 | 38  | -21.29 | 4.08 | 3.2 | 6588–6481    | 6639–6463    | This work |
| CIRAM-10299 | AB2        | q. 6β/MUSE-PRE-c120 6145 | Bone (Calcaneus)       | <i>Rupricapra rupricapra</i> | 7977 | 40  | -21.3  | 2.08 | 3.4 | 7037–6825    | 7046–6699    | This work |
| R-1138      | AB3        | Contact with AC1         | Charcoal               | n.d                          | 8140 | 80  | -25.4  | n.d  | —   | 7314–7047    | 7456–6827    | [15]      |
| CIRAM-10301 | AB3        | q. 6β/MUSE-PRE-c120 6147 | Bone (Phalanx 2)       | <i>Cervus elaphus</i>        | 8643 | 40  | -22.23 | 3.08 | 3.3 | 7711–7591    | 7742–7587    | This work |
| R-1139      | AC-1       |                          | Charcoal               | n.d                          | 8220 | 80  | -26.7  | n.d  | —   | 7341–7078    | 7471–7061    | [15]      |
| CIRAM-7967  | AC1        | q. 6β/MUSE-PRE-c120 6125 | Bone (Phalanx 1)       | <i>Cervus elaphus</i>        | 8612 | 37  | -21.69 | 3.61 | 3.3 | 7708–7583    | 7732–7581    | This work |
| CIRAM-10302 | AC2        | q. 5/MUSE-PRE-c120 6148  | Tooth (Molar sup.)     | <i>Cervus elaphus</i>        | 8175 | 36  | -22.87 | 4.72 | 3.3 | 7249–7073    | 7321–7064    | This work |
| R-1140      | AC-2       |                          | Charcoal               | n.d                          | 8560 | 70  | -26.3  | n.d  | —   | 7649–7525    | 7744–7484    | [15]      |
| R-1141      | AC-3       |                          | Charcoal               | n.d                          | 8590 | 90  | -25.6  | n.d  | —   | 7722–7538    | 7942–7484    | [15]      |
| CIRAM-10663 | AC3        | q. 6α/MUSE-PRE-c120 6158 | Tooth (Molar 1–2 sup.) | <i>Capra ibex</i>            | 8795 | 35  | -21.32 | 3.3  | 3.2 | 7946–7780    | 8170–7680    | This work |
| R-1142      | AC-4       |                          | Charcoal               | n.d                          | 8740 | 90  | -26    | n.d  | —   | 7941–7606    | 8195–7591    | [15]      |
| CIRAM-10304 | AC4        | q. 5β/MUSE-PRE-c120 6150 | Bone (Phalanx 3)       | <i>Cervus elaphus</i>        | 8805 | 37  | -23.02 | 3.49 | 3.2 | 7954–7769    | 8178–7728    | This work |
| CIRAM-10305 | AC5        | q. 5β/MUSE-PRE-c120 6151 | Bone (Calcaneus)       | <i>Cervus elaphus</i>        | 8520 | 37  | -22.12 | 3.61 | 3.3 | 7588–7540    | 7594–7526    | This work |
| R-1143a     | AC-5–6     |                          | Charcoal               | n.d                          | 9090 | 90  | -25.7  | n.d  | —   | 8455–8232    | 8560–7966    | [15]      |

(Continued)

**Table 1.** (Continued)

| Lab         | Level  | Unit                     | Sample            | Specie                | BP   | SD  | 13C    | 15N  | CN  | Cal. 68% BCE | Cal. 95% BCE | Ref.      |
|-------------|--------|--------------------------|-------------------|-----------------------|------|-----|--------|------|-----|--------------|--------------|-----------|
| CIRAM-10306 | AC6    | q. 6δ/MUSE-PRE-c120 6152 | Bone (Calcaneus)  | <i>Cervus elaphus</i> | 8740 | 37  | -22.25 | 3.06 | 3.3 | 7965–7611    | 7942–7605    | This work |
| R-1144a     | AC-7   |                          | Charcoal          | n.d                   | 9100 | 90  | -25.5  | n.d  | –   | 8455–8239    | 8607–7975    | [15]      |
| CIRAM-10307 | AC7    | q. 6α/MUSE-PRE-c120 6153 | Bone (Metatarsus) | <i>Cervus elaphus</i> | 9020 | 37  | -22.14 | 3.49 | 3.3 | 8281–8240    | 8297–8019    | This work |
| CIRAM-10308 | AC8    | q. 5/MUSE-PRE-c120 6154  | Bone (Metapodium) | <i>Sus scrofa</i>     | 9035 | 38  | -21.53 | 4.57 | 3.3 | 8285–8246    | 8300–8211    | This work |
| R-1145a     | AC-8–9 |                          | Charcoal          | n.d                   | 9200 | 90  | -25.9  | n.d  | –   | 8540–8301    | 8632–8259    | [15]      |
| R-1145      | AC-8–9 |                          | Charcoal          | n.d                   | 9200 | 90  | -26.1  | n.d  | –   | 8540–8301    | 8632–8259    | [15]      |
| CIRAM-10309 | AC9    | q. 4δ/MUSE-PRE-c120 6155 | Bone (Phalanx 3)  | <i>Cervus elaphus</i> | 8882 | 37  | -21.8  | 4.73 | 3.3 | 8197–7960    | 8232–7847    | This work |
| R-1146B     | AE     |                          | Charcoal          | n.d                   | 9490 | 80  | -26.6  | n.d  | –   | 9119–8639    | 9186–8569    | [15]      |
| R-1146Aa    | AE-1–4 |                          | Charcoal          | n.d                   | 9580 | 250 | -25.5  | n.d  | –   | 9290–8617    | 9751–8292    | [15]      |
| R-1146a     | AE-1–5 |                          | Charcoal          | n.d                   | 9420 | 60  | -25.6  | n.d  | –   | 8781–8622    | 9117 –8490   | [15]      |

<https://doi.org/10.1371/journal.pone.0331392.t001>

## Results

The first model generated (model 1 in Table 2) includes all the layers and dates considered in the methodological section. The result presents a concordance index below 60% ( $A_{\text{model}} = 6.7\%$ ), showing the presence of inconsistencies between the radiometric data and the internal organisation of the phases (36.3% of the sample available for Romagnano are considered outliers). Therefore, a second Bayesian model (model 2 in Table 2) has been elaborated in which the two dates from the layers considered as reworked or altered have been discarded.

Although the concordance results of this model increase, they are still below the acceptance threshold.

According to the previous model, a third proposal has been made (model 3 in Table 2) removing all dates indicated as outliers (Layer AB1: CIRAM-7964; Layer AC2: CIRAM-10302; Layer AC5: CIRAM-10305 and Layer AC6: CIRAM-10306) revealing a good agreement ( $A_{\text{model}} = 107.7\%$ ). This model allows us to have the first intra-site chronological proposal associated with the two technocomplexes explored in this work (Fig 2). Based on the results of this model, the beginning of the Sauveterrian falls between 10191 and 8859 cal. BCE (95% probability), while the transition between this latter and the Castelnovian between 7684 and 6872 cal. BCE, at 95% probability. Finally, the first evidence of agropastoral societies in Romagnano is placed between 5188–4878 cal. BCE.

Once the first chronometric proposal was obtained, a second group of Bayesian models was made to explore the chronology of the different sub-phases according to the evolution of lithic production. This model (model 4 in

**Table 2.** Values obtained from the different Bayesian models generated. The code for the different OxCal models is available in Supporting Information (S1–S7 Files).

| Bayesian model     | Amodel | Aoverall |
|--------------------|--------|----------|
| Model 1 (3 phases) | 6.7    | 3.4      |
| Model 2 (3 phases) | 21.8   | 12.5     |
| Model 3 (3 phases) | 107.7  | 107.2    |
| Model 4 (6 phases) | 18.5   | 11.7     |
| Model 5 (6 phases) | 41.5   | 27.5     |
| Model 6 (6 phases) | 56.2   | 80.6     |
| Model 7 (6 phases) | 107.4  | 105.6    |

<https://doi.org/10.1371/journal.pone.0331392.t002>

OxCal v4.4.4 Bronk Ramsey (2021); r.5 Atmospheric data from Reimer et al (2020)

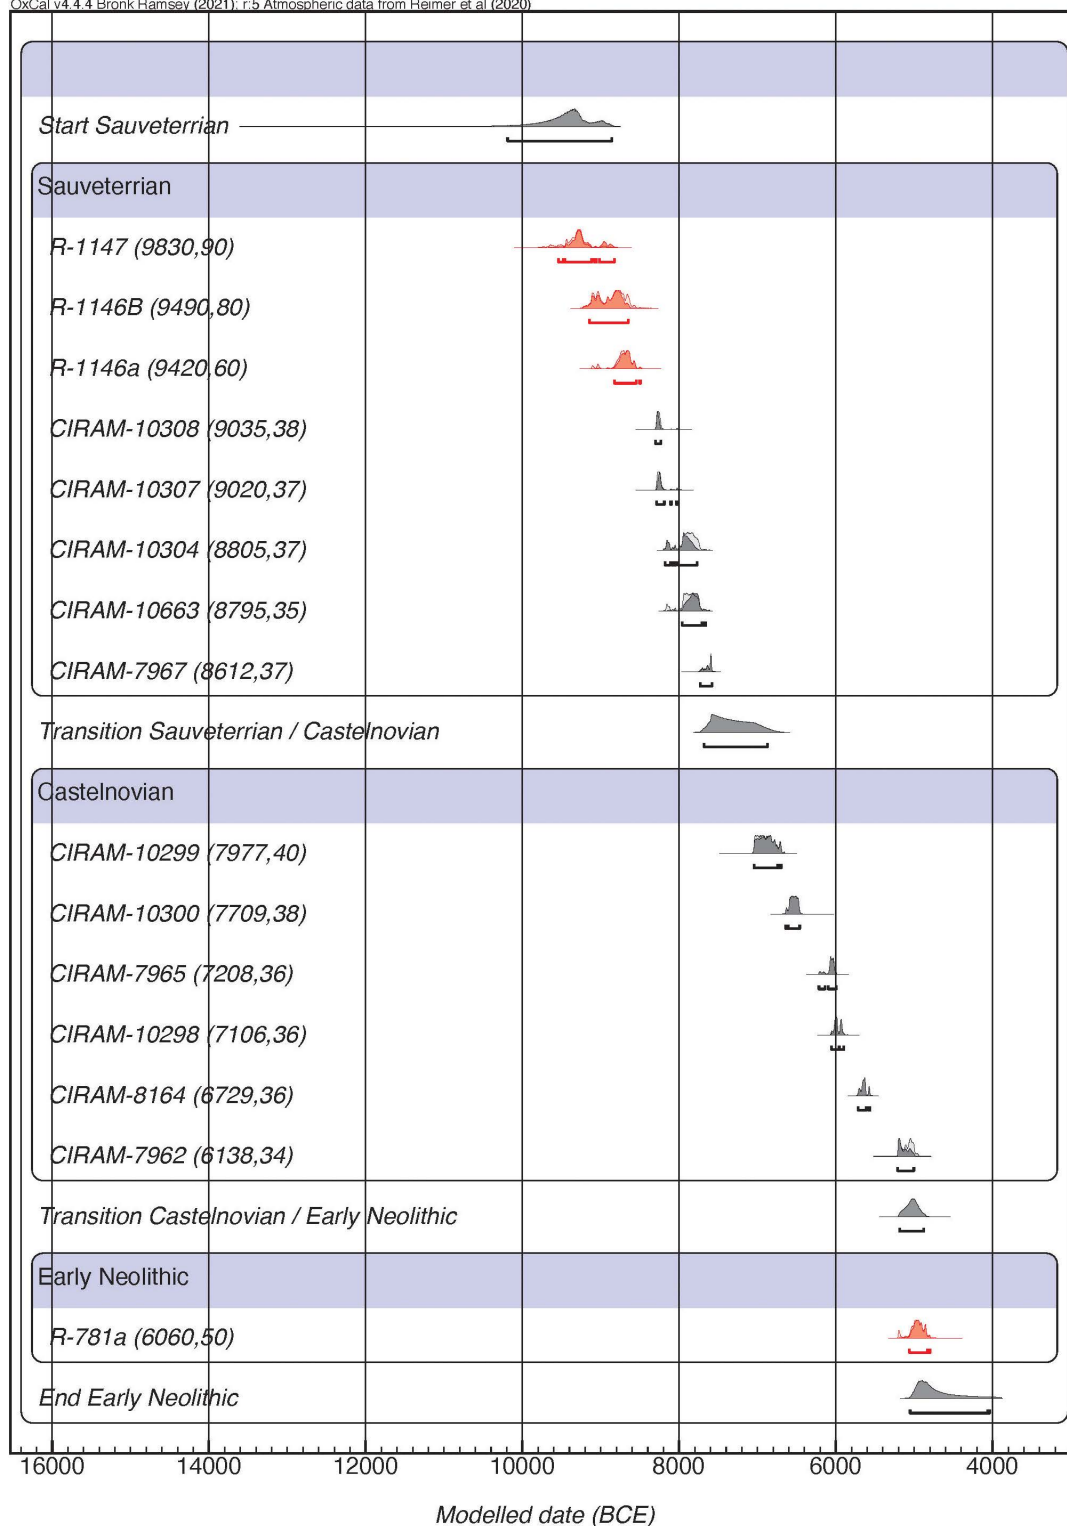

**Fig 2. Bayesian model without considering the internal periodisation of each phase of the Mesolithic.** The red colour indicates the radiocarbon dates made on charcoal.

<https://doi.org/10.1371/journal.pone.0331392.g002>

[Table 2](#)) has been constructed using the same data and layers as model 1. Again, the results present a poor agreement index ( $A_{\text{model}} = 18.5\%$ ) as model 1. So, the same procedure has been carried out as in the previous case: we have built another model removing layers AC9 and AB3 (model 5 in [Table 2](#)). Although the concordance value of this model increases ( $A_{\text{model}} = 41.5\%$ ), it is still below the acceptance threshold. Results indicate the existence of 4 outliers, 2 of which are associated with the Middle Sauveterrian (AC6 & AC5) and the other two correspond to the two samples from the Recent Sauveterrian (AC2 & AC1). However, to avoid discarding the whole sample available for the Recent Sauveterrian, we decided to perform another Bayesian model (model 6 in [Table 2](#)), removing only those dates with outlier values greater than 60/100 (Layer AC5: CIRAM-10305). Although this model only identifies one date as a possible outlier (layer AC2: CIRAM-10302) results still show an agreement index below the threshold considered by OxCal. According to the previous model, a new model has been defined (model 7 in [Table 2](#)) removing the radiocarbon date from Layer AC2 (CIRAM-10302,  $8175 \pm 36$  BP) and revealing a good agreement ( $A_{\text{model}} = 107.4\%$ ). This model allows us to define better the periodisation of the Sauveterrian and the Castelnovian complexes ([Fig 3](#)).

Following the results obtained in this model ([Table 3](#)), the first evidence of the Early Sauveterrian complex starts between the second half of the X millennium cal. BCE and the first quarter of the IX millennium cal. BCE. The boundary between Early-Middle Sauveterrian encompasses the second half of the IX millennium cal. BCE ( $8693\text{--}8249$  at 95% of probability). As far as the Middle/Late transition is concerned, it is located in the first half of the VIII millennium cal. BCE. The first evidence of trapezes marks the starting point of the Early Castelnovian (last quarter of the VIII millennium cal. BCE. to the beginning of the VI millennium cal. BCE). Finally, the reduction of triangles and the notable increase of trapezes is the turning point to differentiate the Early and Late Castelnovian. According to the Bayesian modelling obtained the transitional phase spans the first half of the VI millennium cal. BCE.

## Discussion

The new radiometric corpus carried out in Romagnano Loc III provides interesting insights into the *Castelnovisation* of Southwestern Europe. Firstly, our data support an early radiocarbon date for the beginning of the Castelnovian occupations in Romagnano (layer AB2 with 66% of trapezes) at the beginning of the VII millennium ( $7046\text{--}6747$  cal. BCE). This data is consistent with Clark's original proposal [25] and subsequent revisions for an East-West gradient of this techno-complex [1, 18, 26]. However, the results obtained at Romagnano suggest the need to revisit the debate concerning the pathways of expansion of this phenomenon in Southwestern Europe. In this regard, although the influence of climatic events as the primary driver of dispersal remains an open question [27], no clear correlation between the spread of the Late Mesolithic and climatic fluctuations has been identified in the geographical area examined in this work [28]. Consequently, the discussion will focusses on issues of chronology and stratigraphy (see [S8 Text](#) and [S9 Table](#)).

Some authors have suggested that pressure-knapping blade production is an original marker, and they identified a relationship between trapezes and the pressure-knapping technique in the Upper Capsian industries of the Maghreb [29]. The French school advocated this relationship could indicate a link between 'Castelnovian-like' industries and the Upper Capsian. Therefore, they have proposed an origin of the Blade-Trapeze industries in Sicily according to the stratigraphy of Grotta dell'Uzzo (Sicily) and the distribution of pressure-knapping blade production linked to the Late Mesolithic trapeze production in the Western Mediterranean, along with a critical review of the radiocarbon information and lithic collection from Northwestern Africa [18, 30, 31]. So, could Grotta dell'Uzzo be the origin of this technological complex? Despite the important research in the cave, the most reliable published Castelnovian information comes from Trench F (layers 11–14) [32, 33], and the chronology is placed at the beginning of the VII millennium cal. BCE. However, the oldest date associated with the Castelnovian levels comes from an unidentified charcoal sample [34] (P-2734,  $7044\text{--}6640$  cal. BCE). The available short-lived dates come from human remains (OxA-V-2364-43,  $6503\text{--}6222$  cal. BCE) and a cetacean (MAMS-16238,  $6444\text{--}6011$  cal. BCE) [35] and they show a chronology that places the Castelnovian evidence from Grotta dell'Uzzo in

OxCal v4.4.4 Bronk Ramsey (2021); r:5 Atmospheric data from Reimer et al (2020)

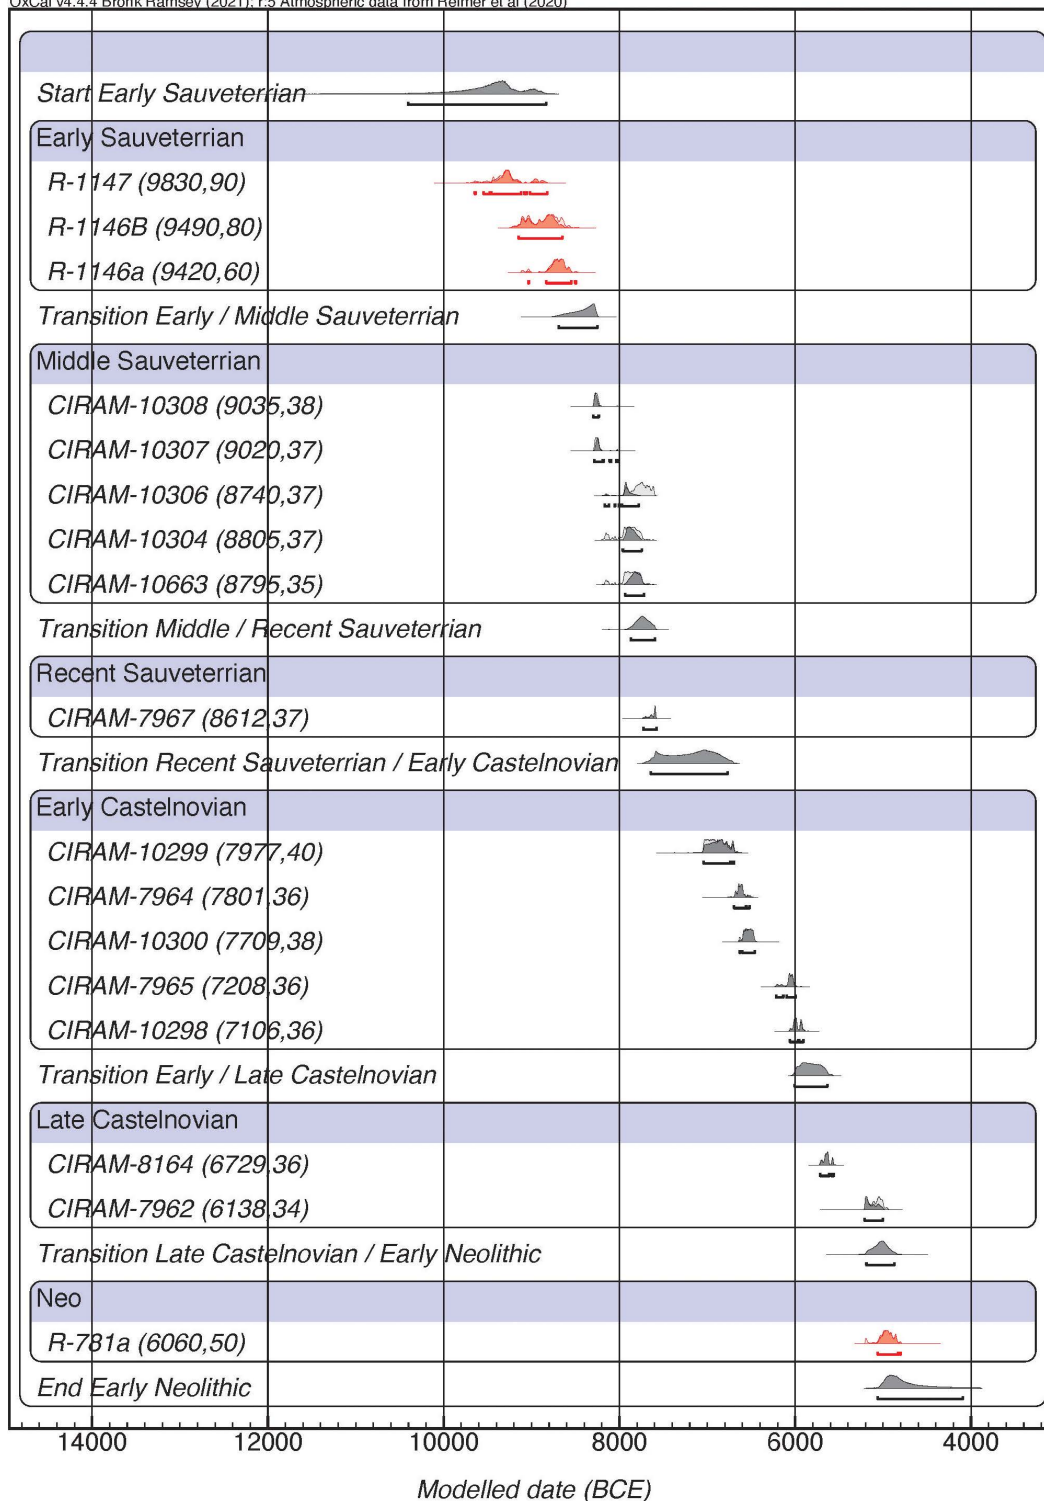

**Fig 3. Bayesian model considering the internal periodisation of each phase of the Mesolithic.** The red colour indicates the radiocarbon dates made on charcoal.

<https://doi.org/10.1371/journal.pone.0331392.g003>

**Table 3. Results of Romagnano rock shelter based on model 7 showing posterior (modelled) radiocarbon distributions.**

| Phase                                  | cal. BCE 68%<br>(unmodelled) | cal. BCE 95%<br>(unmodelled) | cal. BCE 68%<br>(modelled) | cal. BCE 95%<br>(modelled) |
|----------------------------------------|------------------------------|------------------------------|----------------------------|----------------------------|
| Early Sauveterrian                     | 9447–8622                    | 9740–8490                    | 9387–8624                  | 9645–8494                  |
| Transition Early-Middle Sauveterrian   |                              |                              | 8493–8264                  | 8693–8249                  |
| Middle Sauveterrian                    | 8285–7780                    | 8300–7680                    | 8287–7753                  | 8299–7721                  |
| Transition Middle-Recent Sauveterrian  |                              |                              | 7811–7656                  | 7872–7596                  |
| Recent Sauveterrian                    | 7708–7583                    | 7732–7581                    | 7653–7582                  | 7730–7578                  |
| Transition Sauveterrian – Castelnovian |                              |                              | 7599–6850                  | 7643–6771                  |
| Early Castelnovian                     | 7037–5921                    | 7046–5900                    | 6971–5925                  | 7042–5906                  |
| Transition Early-Late Castelnovian     |                              |                              | 5941–5706                  | 6006–5636                  |
| Late Castelnovian                      | 5559–5002                    | 5571–4960                    | 5667–5038                  | 5718–5004                  |
| Transition Castelnovian – Neolithic    |                              |                              | 5108–4942                  | 5191–4874                  |
| Neolithic sensu lato                   | 5033–4853                    | 5206–4799                    | 5011–4851                  | 5064–4800                  |

<https://doi.org/10.1371/journal.pone.0331392.t003>

the second half of the VII millennium cal. BCE. The results should be treated with caution because the samples may be affected by both the reservoir and the old wood effects, as widely discussed in the archaeological literature [19,34–38] but see also see S8 Text and S9 Table]. Similarly, the results of the CIMO project indicate that an early chronology for the Castelnovian levels at Grotta dell'Uzzo can be rejected [39].

The alternative theoretical origin of the Blade-Trapeze Complex was identified on the Crimean Peninsula [25,40]. According to archaeological records, some sites such as Shan-Koba [41], Lapsi7 [42], and Myrne [43], among others, are associated with the production of trapezes from the Late Mesolithic. However, while there is clear evidence that geometric arrowheads were made from blades, there are no documented instances of pressure-knapping being employed for their manufacture [44]. To this must be added the existence of confusion in the cultural attribution of the lithic assemblages due to methodological problems between typology and functionality related to the 'kukrek inserts' [45]. If we focus on radiometric information from the region, different radiocarbon dating programmes have been carried out in recent years [46–48]. According to the radiocarbon dates available for Myrne, the chronology of the trapezes is placed at the second part of the VIII cal. BCE. It corresponds to an open-air site with horizontal stratigraphy and is one of the most impressive sites in the region [49]. Furthermore, the radiometric information comes from several areas where trapezes are less than in other areas [47], with end scrapers being the most common tools [43]. Therefore, the information should be taken with caution, not only because of the possible existence of palimpsests but also because of the possibility that the radiocarbon dates come from a previous Mesolithic occupation based on the lithic assemblages recovered. The site of Lapsi7 is complex not only because of its stratigraphy but also because of the existence of possible levels characterised by palimpsests due to the "cohabitation of different cultural groups", as recently highlighted by Telegin and coll. [42]. To this must be added the chronological uncertainty of layer D due to the inconsistency of the radiocarbon dates obtained. If we focus on the two dates obtained by the AMS method [41], the first evidence of trapezes is between 7745–7582 cal. BCE. Although the two dates are chronologically consistent, both have been made on charcoal remains (*Ulmus* and *Pomoideae*), so doubts about whether they are affected by the old wood effect are present. Finally, the Shan Koba shelter is the last key site to support the Crimean hypothesis. In this site, excavated between 1928 and 1936, six archaeological levels were identified, of which the upper ones (levels 1–3) have yielded trapezoidal arrowheads. While levels 1 and 2 show a Neolithic root [50], level 3 has traditionally been related to the Tardenoisian complex [51]. This Late Mesolithic level is characterised by notched bladelets, backed points and geometric microliths including trapezes, triangles and lunates [52]. Two of the five radiocarbon short-lived dates available for layer 3 should be considered as outliers [41]. The first of these comes from the deepest spit of the layer, but it has an extremely recent chronology compared to the rest (GrA-50242, 7075 ± 45 BP).

Conversely, the second outlier comes from the same spit and presents an older chronology (KIA-9571,  $8357 \pm 52$  BP) than the rest of the available dates, showing an internal coherence. In light of the existing radiometric contradiction of level 3 (split 3), a cautious approach is recommended regarding the ancient chronology of the Shan-Koba site concerning the trapeze industries.

Then, it would be reasonable to enquire whether any additional evidence might assist in investigating the Castelnavian origin. In this respect, analysing ancient DNA could be a useful avenue of inquiry. The archaeogenetics literature on hunter-gatherer groups has identified two supra-regional metapopulation groups: Eastern and Western Hunter-Gatherer clusters [53]. Nevertheless, other studies conducted in southwestern Europe, particularly in Sicily, indicate the presence of an Eastern Hunter-Gatherer signal during the Castelnavian period. This signal is associated with hunter-gatherer groups from diverse geographical regions such as Ukraine, the Iron Gates (Romania) or Northern Europe [54]. These results suggest the potential for Eastern European populations to have spread in relation to the blade-trapeze complex. Despite the lack of definitive conclusions, available data suggest the possibility of demographic expansion of the Castelnavian complex, with a potential origin in the Crimean area.

The combination of chronological and paleogenetics evidence and the available data from Romagnano and other key sites, including Cueva de La Cocina [55], Baume Montclus [56], Roquemissou [57], along with the systematic review carried out for the Western Balkans [58], allows an examination of the chronology of the earliest evidence for Castelnavian industries in southwestern Europe to be examined and the robustness of the hypotheses concerning their origin to be assessed (Fig 4).

As outlined above, the information available for the Crimean area is inconclusive. However, although there is no evidence of pressure knapping, there is no doubt about the blade nature of the trapezoidal arrowheads. Also, the different radiocarbon dates available from several archaeological sites suggest a chronology associated with the first evidence of 'Castelnavian-like' trapezes around the first half of the VIII millennium cal. BCE (7734–7582 cal. BCE). Technological studies concentrating on the knapping systems and new excavations with rigorous stratigraphic control and radiocarbon programs are fundamental to reinforcing this proposal.

One of the best known sites attributed to the Castelnavian in the Adriatic-Ionian zone is Konispol Cave [61]. However, the reliability of the context and cultural attribution has been questioned [62,63], and the precise chronology of this site remains uncertain, as the dating of several unidentified charcoal samples has yielded inconsistent results [61]. In the Eastern Adriatic, the most reliable information on the Late Mesolithic comes from present-day Montenegro. Late Mesolithic occupations characterised by blade and trapeze industries attributable to the Castelnavian are documented at Crvena Stijena, Vruća Pećina and Odmuť [7,64,65]. Castelnavian elements include the laminar character of these industries, the use of pressure flaking and indirect percussion, and the presence of characteristic tool types, such as trapeze micro-liths (potentially produced in some cases with the microburin technique), notched blades, and circular endscrapers. The probable use of both knapping techniques, alongside certain technological procedures evidenced on the proximal parts of blades makes the Montenegrin *chaîne opératoire* resemble those observed in southern Italy [58].

Despite recent radiometric programmes, the chronology associated with the Castelnavian complex is still unclear. Firstly, the recently proposed dates for the Late Mesolithic levels at the Crvena Stijena indicate that the evidence for this cultural complex can be dated in the second half of the IX millennium cal. BCE (8226–7829 cal. BCE). Nevertheless, the sample from a deer metacarpus is of a date that could be considered somewhat out of context, having been derived from an association of layers determined from depths and descriptions made in the 1950s [66]. In addition, radiometric data is available from other sites, such as Odmuť, Vruća and Vrbička [67]. In the case of Vrbička cave, which has a calibrated chronology between 7073–6653 cal. BCE, the lithic assemblage fails to display the characteristic attributes traditionally associated with the Castelnavian. However, blades, bladelets, and prismatic cores are reported [67]. In the case of Odmuť and Vruća, the radiocarbon dates have been obtained from the bone industry (harpoons) and span a chronological range from the end of the VIII to the beginning of the VII millennium cal. BCE. Nevertheless, despite the potential association

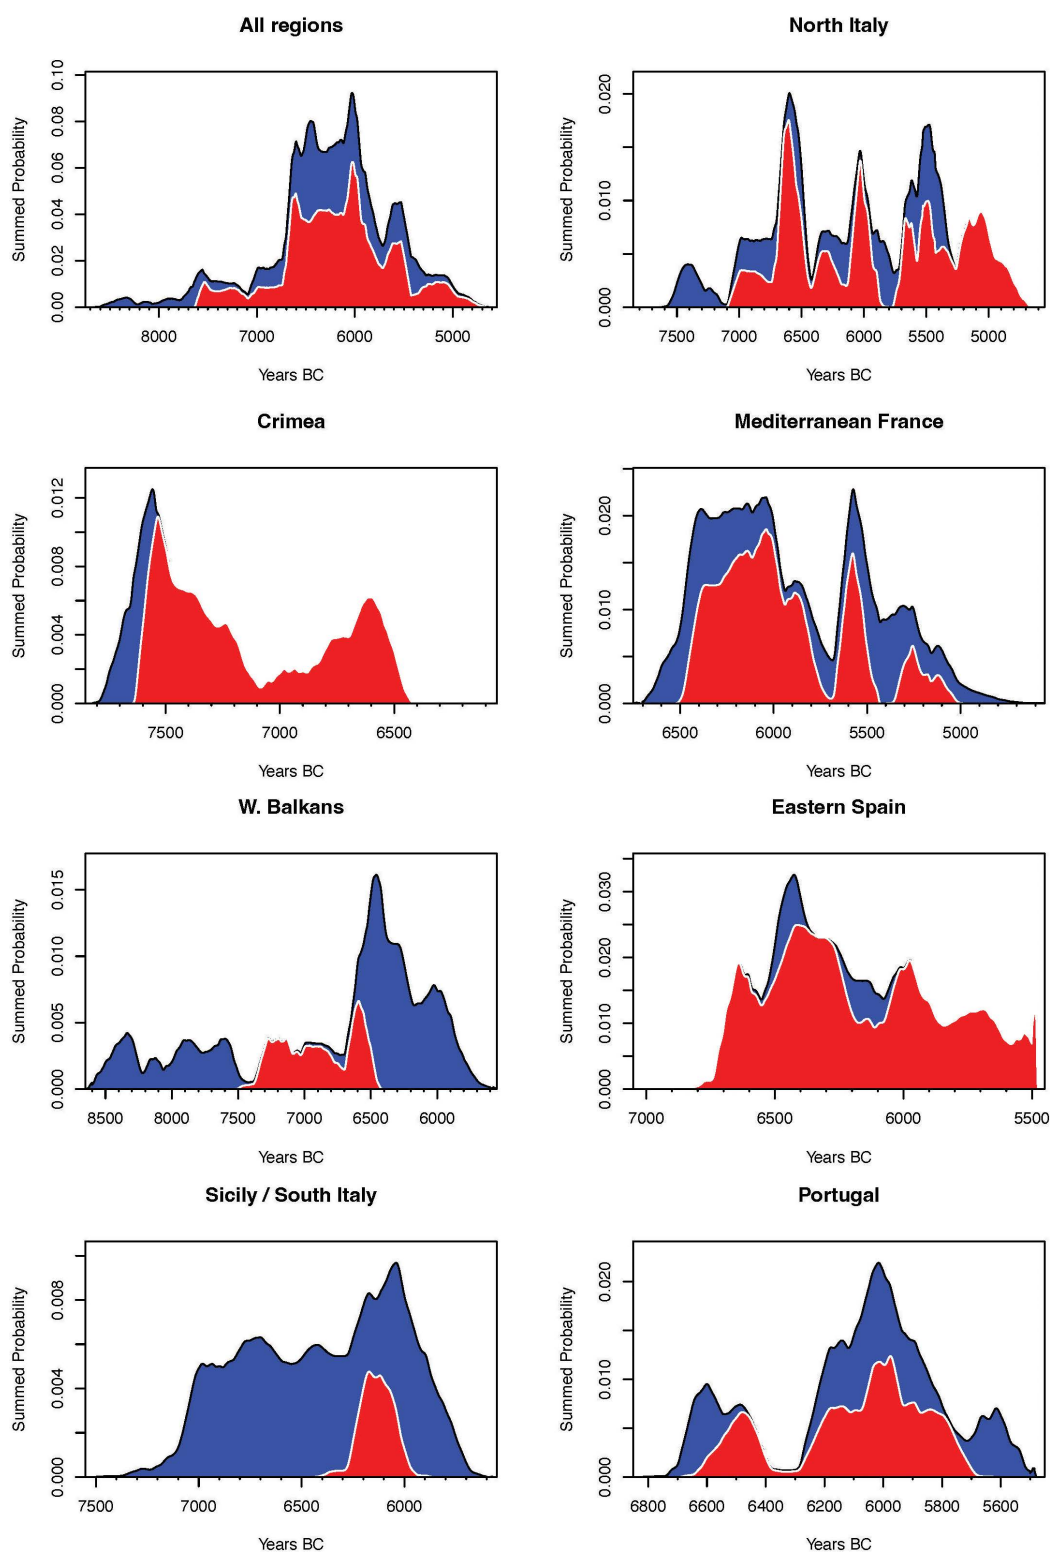

**Fig 4. Summed probability distribution across the various geographical regions considered based on the nature of the dated sample (blue denotes all radiocarbon data; red means short-lived samples).** This has been created using the R software [59] and the rcarbon package [60].

<https://doi.org/10.1371/journal.pone.0331392.g004>

of the lithic industry with the Castelnovian complex, further evidence is required to ascertain whether the earliest dates related to the harpoons are indeed attributable to an earlier cultural horizon or not [58,68].

Moving to Italy, most evidence concerning the Castelnovian period in the southern area comes from Grotta dell'Uzzo (Sicily), Latronico 3 (Basilicate) and Terragne di Manduria (Apulia). The lithic assemblages are characterised by symmetrical/asymmetrical trapezes based on the microburin technique and the preferential use of specific raw materials to produce bladelets [33,69]. In light of the chronological reviews in Sicily [63], it is indisputable that the chronology of the Castelnovian complex started in the second half of the VII millennium cal. BCE. Regarding the southern Italian peninsula, archaeological data are more complex due to the coexistence of diverse techno-cultural traditions and a radiometric framework derived from unidentified charcoal samples [70]. In this sense, the first Castelnovian evidence in the area, according to the chronology available for the site of Latronico 3, is dated to the first half of the VII millennium cal. BCE while Terragne's data suggest a chronology between the end of the VII millennium cal. BCE and the beginning of the VI millennium cal. BCE [71]. In the northern Apennine region, the most substantial evidence of Castelnovian activity is observed at Piazzana and Lama Lite sites [72,73]. A systematic study of the lithic industry has been conducted on both sites, which exhibit all the defining characteristics of the Castelnovian complex. However, the chronology is not solid, as the Late Mesolithic levels have been dated from unidentified charcoal samples. In this regard, while the date of Lama Lite's context suggests a very late chronology (first half of the VI millennium cal. BCE [74]), the date of Piazzana indicates the presence of the Castelnovian in the region during the second half of the VII millennium cal. BCE [75]. Further research is required to enhance the understanding of the Castelnovian complex and establish a chronology that meets the established radiometric standards. In the case of north-eastern Italy, the information associated with the Castelnovian comes from various sites such as Riparo Gaban, Mondeval de Sora, Mezzocorona-Borgonuovo, and Romagnano among others [9]. In the case of Gaban [76], the archaeological record related to the Castelnovian layers is characterised by a high geometric component, achieved through the microburin technique. Radiometric data place the first evidence of trapezes between 7045–6467 cal. BCE, although all of these have been obtained from unidentified charcoal samples. Regarding the burial of Mondeval de Sora [77], the lithic assemblage, characterised by the presence of indirect percussion and pressure flaking, suggests a Castelnovian chronology. This has been corroborated by the radiometric analysis of the human remains, which indicates a Late Mesolithic occupation in the second half of the VII millennium cal. BCE. Another burial that provides evidence of Castelnovian presence in the region is Mezzocorona-Borgonuovo [78]. However, the radiometric data are contradictory. Recently, a new radiometric analysis was conducted following all quality standards [79], and its results suggest a chronology between 5612–5409 cal. BCE. Nevertheless, there is no lithic evidence available to conform and/or refine this chronology, especially considering that the dating obtained from the possible grave goods associated with the burial shows a chronology related to the beginning of the VII millennium cal. BCE. Finally, the chronological revision of Romagnano III places the first Castelnovian evidence at the end of the VIII millennium cal. BCE and the beginning of the VII millennium cal. BCE based on the oldest date related to layer AB2. Although younger dates have been obtained from the same stratigraphic layer, they come from a different spatial unit within that layer and can therefore be considered as reflecting a later occupation associated with the same phase of this technocomplex. This chronology is contemporary with the eastern Adriatic area and a few centuries older than that of the rest of the western Mediterranean. Consequently, an alternative origin of the Castelnovian in the Alpine area could be considered. Nevertheless, despite surpassing all radiometric quality standards such as carbon-nitrogen ratio, this date is older than others in the region. Consequently, this proposal should be regarded as a working hypothesis to be checked by further analysis and by increasing the dates for this archaeological context following Bayliss and Marshall's proposal [80]. This will allow us to either confirm or refute this hypothesis, especially given the absence of radiocarbon dates from other regional sites, such as Vatte di Zambana and Riparo Padestel, that meet all established radiometric hygiene protocols.

In Mediterranean France, Font-des-Pigeons [81], Mourre-du-Sève [82], Montclus [83], Roquémisou [84], and other sites provide information on the Castelnovian complex. Various works that have focused on techno-typological studies

have identified all the elements that define the Castelnavian, including pressure knapping, indirect percussion, prismatic cores, blades, bladelets and geometric armatures such as symmetrical and asymmetrical trapezes [85,86]. In this sense, the first evidence of this technocomplex, according to the stratigraphic and radiometric revisions in the region [56,85,87], is located in the second half of the VII millennium cal. BCE.

As far as the Iberian Peninsula, there is a wealth of information on the Late Mesolithic [88]. On the one hand, in the eastern quadrant, the most representative site, which has recently undergone a thorough revision, is the Cueva de la Cocina [55,89]. Based on its chronostratigraphic information, the Castelnavian horizon is dated to the second half of the VII millennium cal. BCE. It should be noted that at the base of the sequence, there is a date that places the first occupation of the cave in the first half of the VII millennium cal. BCE, but the associated lithic information is scarce and not very diagnostic, so it cannot be associated with the Castelnavian complex. On the other hand, in the west of the Iberian Peninsula (namely Portugal), there is a great amount of information related to the funerary practices and the way of life of Late Mesolithic groups [90]. However, the cultural information and radiocarbon data cannot be linked because most of it comes from excavations in the late 19<sup>th</sup> and early 20<sup>th</sup> centuries, when there was no exhaustive stratigraphic control. In this region, the context with a reliable stratigraphy that can be linked to the material culture is the Costa do Pereiro site [91], whose level 1b is associated with an industry characterised by the presence of typically Castelnavian geometric microliths (trapezes) dated to the last quarter of the VII millennium cal. BCE.

## Conclusions

The number of Late Mesolithic archaeological contexts that have undergone a systematic study of the lithic assemblages and a reliable radiometric framework remains limited. Furthermore, there is a certain degree of contradiction in some cases. Nevertheless, the chronostratigraphic review carried out at the Romagnano Loc III site allows us to revisit an alternative hypothesis regarding the origin and expansion of the Castelnavian complex. In this regard, in addition to the traditional hypothesis proposed by Gimbutas and Clark during the first half of the twenty century regarding the initial expansion from the Pontic region, an alternative origin can be proposed in the Northern Italy. This alternative hypothesis suggests that the expansion occurred in less than 500 years throughout the western Mediterranean. Nevertheless, this proposal should be regarded as a preliminary hypothesis to be further investigated in the future, given the existence of divergent data, such as that concerning the eastern Adriatic.

To conclude, the evidence indicates that the emergence of the Castelnavian was a multifaceted process that can only be fully understood through a comprehensive, global approach. While this paper has focused primarily on chronological data, strengthening our conclusions will require the future integration of additional variables, including economic, technological, funerary, and settlement patterns. Two fundamental questions remain to be addressed: first, whether the phenomenon was characterised by a unifocal origin or by a process of equifinality involving multiple centres of innovation; and second, whether the rapid spread of the Castelnavian across Europe—within less than a millennium and at a faster rate than the dispersal of agriculture, according to radiocarbon dates—suggests that demic and/or cultural diffusion processes were already at play prior to the Neolithic and it is therefore essential to identify the specific nature of these diffusion mechanisms.

## Supporting information

**S1 File. Oxcal Model 1.**  
(DOCX)

**S2 File. Oxcal Model 2.**  
(DOCX)

**S3 File. Oxcals Model 3.**  
(DOCX)

**S4 File. Oxcals Model 4.**  
(DOCX)

**S5 File. Oxcals Model 5.**  
(DOCX)

**S6 File. Oxcals Model 6.**  
(DOCX)

**S7 File. Oxcals Model 7.**  
(DOCX)

**S8 Text. Radiometric quality control applied to explore the radiocarbon dates used in this work.**  
(PDF)

**S9 Table. Radiocarbon dates used in this paper.**  
(PDF)

## Acknowledgments

The authors acknowledge the *Umst – Soprintendenza per i beni e le attività culturali of the Autonomous Province of Trento and the MUSE – Museo delle Scienze di Trento*. This paper is part of VEM's PhD thesis, and all authors agree. Nerobutto sponsored research activities in the Prehistory Section of MUSE between 2019 and 2025. We would like to thank Daniel S. Hernández Hernández for redrawing the profile of Romagnano. We would like to thank Karol Szymczak (University of Warsaw) and the anonymous reviewer for their insightful comments and suggestions, which have helped to clarify certain ambiguous points and significantly enhance the quality of the manuscript.

## Author contributions

**Conceptualization:** Salvador Pardo-Gordó, Vanessa Extrem-Membrado.

**Formal analysis:** Salvador Pardo-Gordó, Vanessa Extrem-Membrado.

**Funding acquisition:** Salvador Pardo-Gordó, Federica Fontana.

**Investigation:** Salvador Pardo-Gordó, Vanessa Extrem-Membrado.

**Methodology:** Salvador Pardo-Gordó.

**Project administration:** Salvador Pardo-Gordó.

**Resources:** Alex Fontana.

**Supervision:** Salvador Pardo-Gordó.

**Validation:** Salvador Pardo-Gordó.

**Visualization:** Salvador Pardo-Gordó.

**Writing – original draft:** Salvador Pardo-Gordó, Alex Fontana, Vanessa Extrem-Membrado, Emilio Vacas-Fumero, Rossella Duches, Elisabetta Flor, Federica Fontana.

**Writing – review & editing:** Salvador Pardo-Gordó, Alex Fontana, Emilio Vacas-Fumero, Rossella Duches, Elisabetta Flor, Federica Fontana.

## References

1. Marchand G, Perrin T. Why this revolution? Explaining the major technical shift in Southwestern Europe during the 7th millennium cal. BC. *Quat Intern*. 2017;428:73–85. <https://doi.org/10.1016/j.quaint.2015.07.059>
2. Newell RR, Kielman D, Constandse-Westermann TS, Van Der Sander WAB, Van Gijn A. An inquiry into the ethnic resolution of Mesolithic regional groups. The study of their decorative ornaments in time and space. Leiden: Brill; 1990.
3. Escalon de Fonton M. Préhistoire de la basse-provence. Paris: Presses universitaires de France; 1956.
4. Perrin T. Nouvelles réflexions sur transition mésolithique récent-néolithique ancien l'abri gaban (Trento, Italie). *Preistoria Alpina*. 2006;41:89–146.
5. Fontana F, Flor E, Duches R. Technological continuity and discontinuity in the Romagnano Loc III rock shelter (NE Italy) Mesolithic series. *Quat Inter*. 2016;423:252–65. <https://doi.org/10.1016/j.quaint.2015.10.046>
6. Fontana F, Visentin D, Bertola S, Cristiani E, Dipino N, Flor E, et al. Investigating the early-to-late Mesolithic transition in northeastern Italy: a multi-faceted regional perspective. *Open Archaeol*. 2023;9:0220284.
7. Kozłowski SK. Thinking mesolithic. Oxford: Oxbow Books; 2009.
8. Perini R. I depositi preistorici di Romagnano - Loc (Trento). *Preistoria Alpina - Rendiconti*. 1971;7:7–106.
9. Broglio A. Risultati preliminari delle ricerche sui complessi epipaleolitici della Valle dell'Adige. *Preistoria Alpina - Rendiconti*. 1971;7:135–241.
10. Kozłowski SK. Les courants interculturels dans le Mésolithique de l'Europe occidentale. In: Kozłowski SK, ed. *Kes civilisations du 8ème au 5ème millenaire cal BC Europe: Paleoenvironment, structures d'habitat, outillages, economie Pre-actes du IXème congrès UISPP, Nice*. Paris: CNRS; 1976. 135–60.
11. Perrin T. The time of the last hunters: Chronocultural aspects of early Holocene societies in the Western Mediterranean. *Open Archaeol*. 2023;9:1–19.
12. Broglio A, Kozłowski SK. Tipologia ed evoluzione delle industrie mesolitiche di Romagnano III. *Preistoria Alpina*. 1983;19:93–148.
13. Boscato P, Broglio A, Cattani L, Perini R, Sala B. *Preistoria alpina. Romagnano III*. 1992;28:275–84.
14. Boscato P, Sala B. Dati paleontologici, paleoecologici e cronologici di 3 depositi epipaleolitici in Valle dell'Adige (Trento). *Preistoria Alpina*. 1980;16:45–61.
15. Alessio M, Allegri L, Bella F, Impronta S, Belluomini G, Calderoni G. University of Rome carbon-14 dates XVI. *Radiocarbon*. 1978;20:79–104.
16. Bronk Ramsey C. OxCal 4.4. 4 calibration program. 2021. <https://c14archox.ac.uk/oxcal/OxCal.html>
17. Reimer PJ, Austin WEN, Bard E, Bayliss A, Blackwell PG, Bronk Ramsey C, et al. The IntCal20 Northern hemisphere radiocarbon age calibration curve (0–55 cal kBP). *Radiocarbon*. 2020;62(4):725–57. <https://doi.org/10.1017/rdc.2020.41>
18. Perrin T, Marchand G, Allard P, Binder D, Collina C, García-Puchol O. Le second mésolithique d'Europe occidentale: origines et gradient chronologique. *Foundation Fyssen Annales*. 2009;162–78.
19. Schiffer MB. Radiocarbon dating and the “old wood” problem: the case of the Hohokam chronology. *J Archaeol Sci*. 1986;13(1):13–30. [https://doi.org/10.1016/0305-4403\(86\)90024-5](https://doi.org/10.1016/0305-4403(86)90024-5)
20. Zilhão J. The spread of agro-pastoral economies across Mediterranean Europe: a view from the far west. *J Mediterranean Archaeol*. 1993;6:5–63. <https://doi.org/10.1.1.456.9908>
21. DeNiro MJ. Postmortem preservation and alteration of in vivo bone collagen isotope ratios in relation to palaeodietary reconstruction. *Nature*. 1985;317(6040):806–9. <https://doi.org/10.1038/317806a0>
22. van Klinken GJ. Bone collagen quality indicators for palaeodietary and radiocarbon measurements. *J Archaeol Sci*. 1999;26(6):687–95. <https://doi.org/10.1006/jasc.1998.0385>
23. Bronk Ramsey C. Dealing with outliers and offsets in radiocarbon dating. *Radiocarbon*. 2009;51(3):1023–45. <https://doi.org/10.1017/s0033822200034093>
24. Méhault R. Applying a Bayesian approach in the Northeastern North American context: reassessment of the temporal boundaries of the “Pseudo-Scallop Shell Interaction Sphere.”. *Canadian J Arch*. 2017;41:139–72.
25. Clark JGD. Blade and trapeze industries of the European stone age. *Proc Prehist Soc*. 1958;24:24–42. <https://doi.org/10.1017/s0079497x00016716>
26. Gómez-Puche M, Fernández-López de Pablo J. Spatiotemporal patterns on the appearance of the first trapeze industries in the late mesolithic of the Iberian Peninsula. *Radiocarbon*. 2024;66(1):59–100. <https://doi.org/10.1017/rdc.2024.6>
27. Crombé P. Mesolithic projectile variability along the southern North Sea basin (NW Europe): Hunter-gatherer responses to repeated climate change at the beginning of the Holocene. *PLoS One*. 2019;14(7):e0219094. <https://doi.org/10.1371/journal.pone.0219094> PMID: 31314774
28. Marchand G. Beyond the technological distinction between the early and late Mesolithic. *P@lethnology*. 2014;6:9–22.
29. Rahmani N. Le capsien typique et le capsien supérieur: évolution ou contemporanéité: les données technologiques. *Archaeopress*; 2003.
30. Binder D, Collina C, Guilbert R, Perrin T, García-Puchol O. Pressure-knapping blade production in the North-Western Mediterranean region during the seventh millennium cal B.C. In: *The emergence of pressure blade making*. Springer US; 2012. 199–217. [https://doi.org/10.1007/978-1-4614-2003-3\\_7](https://doi.org/10.1007/978-1-4614-2003-3_7)

31. Dachy T, Guéret C, Green W, Perrin T. Rethinking the capsian: lithic variability among holocene maghreb hunter-gatherers. *Afr Archaeol Rev*. 2023;40(1):169–203. <https://doi.org/10.1007/s10437-023-09514-z>
32. Collina C. Evolution des industries lithiques du Néolithique ancien en Italy du sud. Université de Provence et Université de Roma – La Sapienza; 2009.
33. Collina C. Le Néolithique ancien en Italie du Sud. Evolution des industries lithiques entre VIIe et VIe millénaire. Oxford: Oxford University Press; 2015.
34. Meulengracht A, McGovern P, Lawn B. University of Pennsylvania radiocarbon dates XXI. *Radiocarbon*. 1981;23:227–40.
35. Mannino MA, Talamo S, Tagliacozzo A, Fiore I, Nehlich O, Piperno M, et al. Climate-driven environmental changes around 8,200 years ago favoured increases in cetacean strandings and Mediterranean hunter-gatherers exploited them. *Sci Rep*. 2015;5:16288. <https://doi.org/10.1038/srep16288> PMID: 26573384
36. Zilhão J. Time is on my side. In: Hadjikhounis A, Robinson E, Viner S, eds. The dynamics of Neolithisation in Europe studies in honour of Andrew Sherratt. Oxford: Oxbow Books; 2011. 46–65.
37. Bernabeu J. Una visión actual sobre el origen y difusión del Neolítico en la Península Ibérica. In: García Puchol O, Aura Tortosa JE, eds. 8000 años de ocupación humana en la cabecera del río de Alcoi. Alcoi: Museu d'Alcoi; 2006. 189–211.
38. Pardo-Gordó S. ¿Efecto de los huesos de ovicaprinis domésticos en las fechas radiocarbónicas? Un primer ensayo metodológico a partir de los datos disponibles en relación con las primeras sociedades neolíticas de la Península Ibérica. *Archivo de Prehistoria Levantina*. 2020;33:55–76.
39. Binder D, Manen C. Céramiques imprimées de Méditerranée occidentale (VIe millénaire AEC): données, approches et enjeux nouveaux/ Western Mediterranean impressed wares (6th millennium BCE): new data, approaches and challenges. *Société préhistorique française*; 2022.
40. Gimbutas M. The prehistory of eastern Europe. Part I: Mesolithic, Neolithic and copper age cultures in Russia and the Baltic area. Cambridge: Harvard University Bulletin; 1956.
41. Biagi P. The last hunter-gatherers of the northern coast of the Black Sea and their role in the Mesolithic of Europe: a view from Crimea. In: Krauss R, Floss H, ed. Southeast Europe before Neolithisation. Tübingen: Universität Tübingen; 2016. 113–29.
42. Telegin DY, Zaliznyak LL, Yanevich OO. Laspi 7 Mesolithic site on the south coast of crimea, Ukraine. *Archaeol Early His Ukraine*. 2020;37(4):32–51. <https://doi.org/10.37445/adiu.2020.04.03>
43. Stanko VN, Kiosak D. The late Mesolithic settlement of south-western Ukraine. In: VV AA, ed. Atti della Società per la Preistoria e Protostoria della Regione Friuli-Venezia Giulia. Trieste. 2010. 27–100.
44. Nuzhnyj D. Development of microlithic projectile weapons in the stone age. *Anthropologie et préhistorie*. 2000;111:95–101.
45. Biagi P, Kiosak K. The Mesolithic of the northwestern Pontic region new AMS dates for the origin and spread of the blade and trapeze industries in southeast Europe. *Eurasia Antiqua*. 2010;16:21–41.
46. Biagi P, Khlopachev GA, Kiosak D. The radiocarbon chronology of Shan-Koba rock-shelter, a late palaeolithic and mesolithic sequence in the Crimean mountains (Ukraine). *Diadora*. 2014;28:7–20.
47. Biagi P, Stanko VN, Kiosak D. New radiocarbon dates from the site of Mirne. *Haukovi prazi*. 2008;83:33–7.
48. Manko VA, Chkhatarashvili GL. Sosruko site: problems of interpreting of the chipped stone assemblages. *Camera Praehistorica*. 2021;2:36–57.
49. Kitagawa K, Julien M-A, Krotova O, Bessudnov AA, Sablin MV, Kiosak D, et al. Glacial and post-glacial adaptations of hunter-gatherers: investigating the late upper Paleolithic and Mesolithic subsistence strategies in the southern steppe of Eastern Europe. *Quat Inter*. 2018;465:192–209. <https://doi.org/10.1016/j.quaint.2017.01.005>
50. Manko VA, Chkhatarashvili GL. Trapezes with dorsal flat invasive retouching: the indicator of Neolithic network formation. *Tyragetia*. 2023;XVII:103–11.
51. Childe GV. Prehistory in the U.S.S.R. I. palaeolithic and mesolithic. a. caucasus and crimea. *Man*. 1942;42:98–100.
52. Bibikov SN. Compte rendu préliminaire des travaux de la mission archéologique de Crimée en 1935. *Sovetskaya Arkheologiya*. 1936;1:195–212.
53. Mathieson I, Alpaslan-Roodenberg S, Posth C, Szécsényi-Nagy A, Rohland N, Mallick S, et al. The genomic history of southeastern Europe. *Nature*. 2018;555(7695):197–203. <https://doi.org/10.1038/nature25778> PMID: 29466330
54. Yu H, van de Loosdrecht MS, Mannino MA, Talamo S, Rohrlach AB, Childebayeva A, et al. Genomic and dietary discontinuities during the Mesolithic and Neolithic in Sicily. *iScience*. 2022;25(5):104244. <https://doi.org/10.1016/j.isci.2022.104244> PMID: 35494246
55. García-Puchol O, McClure SB, Juan-Cabanilles J, Cortell-Nicolau A, Díez-Castillo A, Pascual Benito JL, et al. A multi-stage Bayesian modelling for building the chronocultural sequence of the late mesolithic at Cueva de la Cocina (Valencia, Eastern Iberia). *Quat Inter*. 2023;677–678:18–35. <https://doi.org/10.1016/j.quaint.2023.05.015>
56. Binder D, Battentier J, Delhon C, Sénépart I. In pursuit of a missing transition: the Mesolithic and Neolithic radiocarbon chronology at La Font-aux-Pigeons rockshelter. *Antiquity*. 2017;91(357):605–20. <https://doi.org/10.15184/aqy.2017.65>
57. Perrin T, Manen C, Valdeyron N, Guilaine J. Beyond the sea... The Neolithic transition in the southwest of France. *Quat Inter*. 2018;470:318–32. <https://doi.org/10.1016/j.quaint.2017.05.027>
58. Kačar S. Evidence of absence or absence of evidence? Searching for late Mesolithic (Castelnovian) hunter-gatherer in the eastern Adriatic. *J Mediterranean Archaeol*. 2022;33:160–84.

59. Core Team. R: a language and environment for statistical computing. Vienna, Austria: R Foundation for Statistical Computing; 2024.
60. Bevan A, Crema ER. rcarbon: Methods for calibrating and analysing radiocarbon dates. 2017. <https://github.com/ahb108/rcarbon>
61. Harrold FB, Russell N, Wickens J. The mesolithic of Konispol cave, Albania. *Iliria*. 2016;49:7–33.
62. Kačar S. Les sociétés mésolithiques de l'arc adriatique oriental: des origines à la néolithisation, de l'Istrie aux côtes épirotes. Toulouse II – Jean Jaurès; 2019.
63. Binder D, Gomart L, Huet T, Kačar S, Maggi R, Manen C. Le complexe de la Céramique Imprimée en Méditerranée centrale et nord-occidentale: une synthèse chronoculturelle (VIIe et VIe millénaires AEC). In: Binder D, Manen C, ed. Céramiques imprimées de Méditerranée occidentale (VIe millénaire AEC): données, approches et enjeux nouveaux. Séances de la Société préhistorique française; 2022. 27–124.
64. Cristiani E, Boric D. Mesolithic harpoons from Odmuť, Montenegro: chronological, contextual, and techno-functional analyses. *Quat Inter*. 2016;423:166–92. <https://doi.org/10.1016/j.quaint.2015.11.010>
65. Mihailovic D. Palaeolithic and mesolithic research in the central Balkans. Belgrade: Serbian Archaeological Society; 2014.
66. Mercier N, Rink WJ, Rodriguez K, Morley MW, Whallow R. Radiometric dating of the Crvena Stijena sequence. In: Whallow R, ed. Crvena Stijena in cultural and ecological context: multidisciplinary archaeological research in Montenegro. National Museum of Montenegro Montenegrin Academy of Sciences and Arts; 2017. 140–9.
67. Boric D, Borovinić N, Đuričić L, Bulatović J, Gerometta K, Filipović D, et al. Spearheading into the neolithic: last foragers and first farmers in the Dinaric Alps of Montenegro. *Eur J Archaeol*. 2019;22(4):470–98. <https://doi.org/10.1017/ear.2019.14>
68. Vitezović S, Vujević D, Radović S. Epigravettian barbed points from Vlakno cave (Croatia): the earliest evidence for barbed point technology in the Adriatic. *Archaeol Anthropol Sci*. 2024;16(12). <https://doi.org/10.1007/s12520-024-02093-3>
69. Dini M, Grifoni Cremonesi R, Kozłowski SK, Molara G, Tozzi C. L'industria castelnoviana della grotta di Iatronico 3 (Potenza, Italia). *Preistoria Alpina*. 2008;43:49–74.
70. Lo Vetro D, Martini F. Mesolithic in Central–Southern Italy: overview of lithic productions. *Quat Inter*. 2016;423:279–302. <https://doi.org/10.1016/j.quaint.2015.12.043>
71. Natali E, Forgias V. The beginning of the Neolithic in Southern Italy and Sicily. *Quat Inter*. 2018;470:253–69. <https://doi.org/10.1016/j.quaint.2017.07.004>
72. Dini M, Fioravanti S. L'industria castelnoviana di Lama Lite: studio tecno-tipologico. *Preistoria Alpina*. 2011;45:229–42.
73. Serradimigni M, Tozzi C. Evidenze paleo-mesolitiche dalla media valle del Serchio: aspetti tecno-tipologici dal saggio A del sito di Piazzana (Lucca). In: Sarti L, Martini F, eds. Una preziosa eredità Scritti in ricordo di Arturo Palma di Cesnola. Firenze: Museo e Istituto Fiorentino di Preistoria "Paolo Graziosi"; 2021. 243–60.
74. Castelletti L, Cremaschi M, Notini P. L'insediamento mesolitico di Lama Lite sull'Appennino tosco-emiliano. *Preistoria Alpina*. 1976;12:3–32.
75. Tozzi C, Notini P. L'epigravettien final et le Mésolithique de l'apennin tosco-émilien et de la vallée du Sercio (Toscane septentrionale). In: Thévenin A, Bintz P, eds. L'Europe des derniers chasseurs Epipaléolithique et mésolithique Actes du 5e colloque international UISPP, commission XII Grenoble, septembre 1995. Paris: Comiré des travaux historiques et scientifiques; 1999. 483–388.
76. Kozłowski SK, Dalmeri G. Riparo Gaban: the Mesolithic layers. *Preistoria Alpina*. 2000;36:3–42.
77. Fontana F, Cristiani E, Bertola S, Brioso F, Guerreschi A, Ziggotti S. A snapshot of Late Mesolithic life through death: an appraisal of the lithic and osseous grave goods from the Castelnovian burial of Mondeval de Sora (Dolomites, Italy). *PLoS One*. 2020;15(8):e0237573. <https://doi.org/10.1371/journal.pone.0237573> PMID: 32797087
78. Dalmeri G, Mottes E, Nicolis F. The Mesolithic burial of Mezzocorona-Burgonuovo (Trento): some preliminary comments. *Preistoria Alpina*. 2001;34:129–38.
79. Sparacello VS, Mottes E, Dori I, Posth C, Knüsel C, Nicolis F. A history of violence in the Mesolithic female skeleton from Mezzocorona-Borgonuovo (Trento, northeastern Italy). *Quat Sci Rev*. 2023;311:108149. <https://doi.org/10.1016/j.quascirev.2023.108149>
80. Bayliss A, Marshall P. Confessions of a serial polygamist: the reality of radiocarbon reproducibility in archaeological samples. *Radiocarbon*. 2019;61(5):1143–58. <https://doi.org/10.1017/rdc.2019.55>
81. Courtin J, Evin J, Thommeret Y. Révision de la stratigraphie et de la chronologie absolue du site de Châteauneuf-lès-Martigues (Bouches-du-Rhône). *L'Anthropologie*. 1985;89(4):543–56.
82. Paccard M, Marq J. L'abri Marq à Sorgues (Vaucluse). *Bulletin de la société d'étude des Sciences naturelles de Vaucluse*. 1993;63:17–32.
83. Escalon de Fonton M. Du Paléolithique supérieur au Mésolithique dans le Midi méditerranéen. *BSPF*. 1966;63(1):66–180. <https://doi.org/10.3406/bspf.1966.4064>
84. Arnal GB. L'abri sous roche de Roquemissou (commune de Gages-Montrozier). *Vivre en Rouergue - Cahiers d'archéologie aveyronnaise*. 1987;1:8–11.
85. Defranould E, Philibert S, Perrin T. Evolutionary dynamics of armatures in southern France in the late mesolithic and early neolithic. *Open Archaeol*. 2022;8(1):905–24. <https://doi.org/10.1515/opar-2022-0261>
86. Binder D. Le néolithique ancien provençal: technologie et typologie des outillages lithiques. Paris: CNRS; 1987.

87. Binder D, Sénépart I. Derniers chasseurs et premiers paysans de Vaucluse. Mésolithique et Néolithique ancien: 7000-4700 av. J.-C. In: Buisson-Catil J, Guilcher A, Hussy C, Pagni M, Olive M, eds. Vaucluse préhistorique le territoire, les hommes, les cultures et les site. Avignon: Editions A. Barthélemy; 2004. 131–62.
88. Utrilla P, Montes Ramírez L. El mesolítico geométrico en la península ibérica. Zaragoza: Universidad de Zaragoza; 2009.
89. Pardo-Gordó S, García Puchol O, Díez Castillo AA, McClure SB, Juan Cabanilles J, Pérez Ripoll M, et al. Taphonomic processes inconsistent with indigenous Mesolithic acculturation during the transition to the Neolithic in the Western Mediterranean. *Quat Inter*. 2018;483:136–47. <https://doi.org/10.1016/j.quaint.2018.05.008>
90. Peyroteo-Stjerna R. Buried side by side: the last hunter-gatherers of the south-western Iberia Peninsula through the lens of their mortuary practices. In: Borić D, Antonović D, Mihailović B, eds. Belgrade: Serbian Archaeological Society; 2021. 629–36.
91. Carvalho AF. A neolitização do Portugal meridional: os exemplos do maciço calcário estremenho e do algarve ocidental. Faro: Universidade do Algarve; 2008.
